# Supplementary material for: Diverse myopathological features in the congenital myasthenia syndrome with GFPT1 mutation
Source: PubMed Central journal article supplement (PMC8865156; doi:10.1002/brb3.2469), 2022-01-03
Supplement: BRB3-12-e2469-s001.pdf [file BRB3-12-e2469-s001.pdf]

Supplemental data

**Diverse myopathological features in the congenital myasthenia syndrome with GFPT1 mutation**

Kaiyan Jiang<sup>1</sup>, Yilei Zheng<sup>1</sup>, Jing Lin<sup>1,2</sup>, Xiaorong Wu<sup>3</sup>, Yanyan Yu<sup>1</sup>, Min Zhu<sup>1,2</sup>, Xin Fang<sup>1,2</sup>, Meihong Zhou<sup>1</sup>, Xiaobing Li<sup>1</sup>, Daojun Hong<sup>1,2</sup>

1. Department of Neurology, the first affiliated hospital of Nanchang University, Nanchang, 330006, China
2. Department of Medical Genetics, the first affiliated hospital of Nanchang University, Nanchang, 330006, China
3. Department of Ophthalmology, the first affiliated hospital of Nanchang University, Nanchang, 330006, China

Correspondence:

Daojun Hong

Department of Neurology, The First Affiliated Hospital of Nanchang University, Nanchang, 330006, China.

Tel: +86-791-8869-2511; Fax: +86-791-8869- 2511

E-mail: hongdaojun@hotmail.com

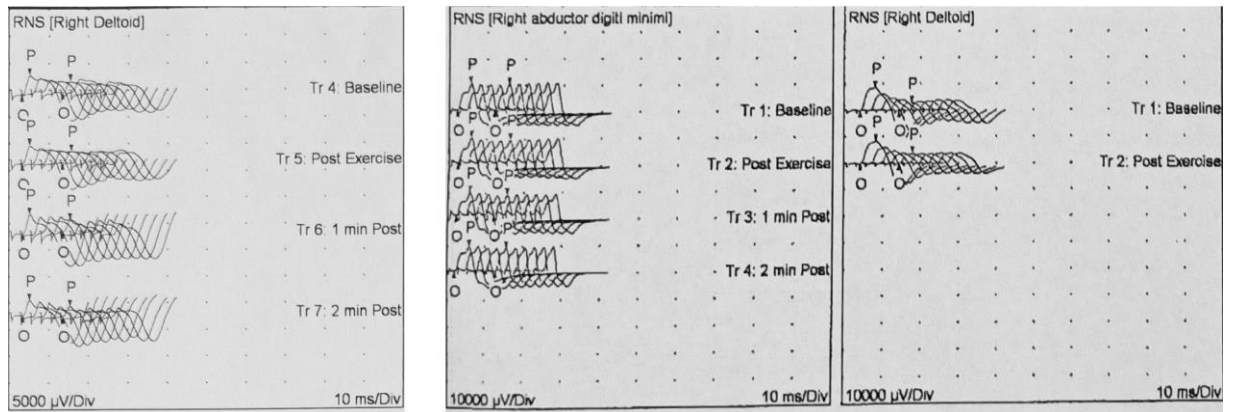

Patient one

Patient two

**Figure S1.** Repetitive nerve stimulation (RNS) at 3Hz in patient one revealed positive decrement of compound muscular action potential (CMAP) in the deltoid. RNS at 3Hz in patient two revealed positive decrement of CMAP in the deltoid and abductor digiti minimi muscle.

**Table S1.** Description of the *GFPT1* gene variants.

| Chr | Pos      | rsIDs        | Ref | Alt | Transcript<br>Consequence | Protein<br>Consequence | VEP<br>Annotation | Clinical<br>Significance                  | Allele<br>Freq |
|-----|----------|--------------|-----|-----|---------------------------|------------------------|-------------------|-------------------------------------------|----------------|
| 2   | 69590695 | rs201322234  | G   | A   | c.331C>T                  | p.Arg111Cys            | missense          | Pathogenic (ClinVar)                      | 0.000139211    |
| 2   | 69590694 | rs189717232  | C   | T   | c.332G>A                  | p.Arg111His            | missense          | Pathogenic (ClinVar)                      | 0.000010625    |
| 2   | 69556825 | rs1024585946 | G   | A   | c.1534C>T                 | p.Arg512Trp            | missense          | Disease<br>associated-Mutation?<br>(HGMD) | 0.000003978    |

Source gnomAD database v2.1.1 @<http://gnomad.broadinstitute.org>; <http://www.hgmd.org>.

**Table S2.** The clinical summarization of GFPT1-related CMS patients with muscle biopsy.

|                                          | Clinical features                                     |                                                               |                                                                    |                                                                            | CK<br>Elevation<br>n x<br>times | EMG                              |                                                  | Muscle biopsy<br>TAs   | Therapy<br>Response to<br>AChE<br>inhibitors |
|------------------------------------------|-------------------------------------------------------|---------------------------------------------------------------|--------------------------------------------------------------------|----------------------------------------------------------------------------|---------------------------------|----------------------------------|--------------------------------------------------|------------------------|----------------------------------------------|
|                                          | Age at<br>onset/<br>age at<br>report<br>(in<br>years) | Symptom<br>onset/<br>at<br>motor<br>milestones                | Facial/bulb<br>ar/respirat<br>ory muscle<br>weakness/<br>other     | Limb girdle<br>weakness/fl<br>uctuation<br>/course                         |                                 | RNS:<br>decrement<br>3Hz%/muscle | Abnormal<br>at<br>SFEMG/<br>Myopathic<br>changes |                        |                                              |
| P1/m/Iran/<br>p.D348Y,homo<br>zygous     | 6/31                                                  | Muscle<br>weakness,<br>fatigue, worse<br>in summer/<br>normal | Yes/no/no/<br>distal limb                                          | Yes/yes/imp<br>roving after<br>age 20                                      | X 1.5                           | Yes/ Proximal                    | ND/ND                                            | Yes                    | Positive, side<br>effects                    |
| P2/f/Turkey/<br>p.W240X,<br>homozygous   | 6/26                                                  | Muscle<br>weakness,<br>fatigue and<br>pain/normal             | None                                                               | Yes/yes/<br>worsening                                                      | Normal                          | 14/distal                        | Yes/yes                                          | Yes                    | Positive                                     |
| P3/NA/Libya<br>p.R111C,homo<br>zygous    | 6/23–<br>35                                           | Muscle<br>weakness,<br>fatigue/normal                         | None                                                               | Yes,<br>shoulder ><br>pelvic<br>girdle/ND/N<br>D                           | Normal                          | 65-35/<br>Trapezius              | ND/yes                                           | Yes                    | Partially<br>positive                        |
| P4/m/Spain/<br>p.M492T and<br>c.*22C > A | 14/55                                                 | Weakness in<br>the upper<br>limbs/<br>normal                  | No/no/no/<br>distal limb                                           | Yes/no/<br>slight<br>worsening                                             | X1.5                            | 21/deltoid                       | Yes/yes                                          | Yes                    | Positive                                     |
| P5/m/Spain/<br>p.M492T and<br>c.*22C > A | 10/50                                                 | weakness,<br>falls/normal                                     | No/no/no/<br>distal limb                                           | Yes/yes/slig<br>ht<br>Worsening                                            | X1.5                            | 26/deltoid                       | Yes/yes                                          | Yes                    | Positive, +3,4<br>DAP                        |
| P6/m/Germany/<br>p.D43V and<br>p.I121T   | 5/16                                                  | Muscle<br>weakness/<br>normal                                 | None                                                               | Yes/yes/<br>slight<br>worsening                                            | X2–8                            | Yes                              | ND/ND                                            | Yes, on<br>re-revision | Positive                                     |
| P7/m/UK/<br>p.R385H and<br>p.R434H       | 8/23                                                  | Fatigue on<br>walk/slight<br>delayed                          | Yes/no/sli<br>ght/slight<br>neck<br>and distal<br>limb<br>weakness | Yes,<br>shoulder<br>and pelvic<br>girdle/no/<br>worsening                  | X2                              | Yes/anconeus                     | Yes/ND                                           | Yes                    | Positive, +3,4<br>DAP                        |
| P8/m/UK/<br>p.T15M and<br>p.R496W        | 6/37                                                  | Repeated<br>falls/<br>normal                                  | Yes/no/no/<br>distal limb                                          | Yes,<br>shoulder<br>and pelvic<br>girdle/yes/<br>improving<br>after age 20 | X5–10                           | Yes                              | Yes/ND                                           | Yes                    | Positive, +3,4<br>DAP                        |

|                                                     | Clinical features                                     |                                                                |                                                                |                                                    | CK<br>Elevation<br>n x<br>times | EMG                              |                                                  | Muscle biopsy<br>TAs               | Therapy<br>Response to<br>AChE<br>inhibitors                                                                           |
|-----------------------------------------------------|-------------------------------------------------------|----------------------------------------------------------------|----------------------------------------------------------------|----------------------------------------------------|---------------------------------|----------------------------------|--------------------------------------------------|------------------------------------|------------------------------------------------------------------------------------------------------------------------|
|                                                     | Age at<br>onset/<br>age at<br>report<br>(in<br>years) | Symptom<br>at<br>onset/<br>motor<br>milestones                 | Facial/bulb<br>ar/respirat<br>ory muscle<br>weakness/<br>other | Limb girdle<br>weakness/fl<br>uctuation<br>/course |                                 | RNS:<br>decrement<br>3Hz%/muscle | Abnormal<br>at<br>SFEMG/<br>Myopathic<br>changes |                                    |                                                                                                                        |
| P9/f/Germany/<br>p.V199F and<br>c.*22 > A           | 13/26                                                 | Fatigue/<br>normal                                             | None                                                           | Yes/yes/<br>stable                                 | Normal                          | 30-60/<br>trapezius              | ND/yes                                           | Yes, on<br>Revision                | Positive                                                                                                               |
| P10/f/Senegal/<br>p.R512W,homo<br>zygous            | 1/7                                                   | Muscle<br>weakness,<br>falls/normal                            | None                                                           | Yes/yes/wor<br>sening                              | Normal                          | 35/ trapezius                    | ND/yes                                           | Suggestive                         | Positive, +3,4<br>DAP                                                                                                  |
| P11/m/Spain/<br>p.M491T,homo<br>zygous              | 7/19                                                  | Muscle<br>weakness/nor<br>mal                                  | None                                                           | Yes/no/stabl<br>e                                  | Normal                          | No/distal                        | ND/yes                                           | One<br>Inclusion                   | Positive, +3,4<br>DAP                                                                                                  |
| P12/m/Spain/<br>c.1278_1281dup<br>and c.*22C > A    | 1/37                                                  | Muscle<br>weakness,<br>falls/slight<br>delayed                 | No/no/no/<br>neck and<br>distal<br>muscles                     | Yes/yes/wor<br>sening                              | Normal                          | 67/<br>Proximal                  | Yes/yes                                          | Unspecific<br>myopathic<br>changes | Positive, +3,4<br>DAP                                                                                                  |
| P13/m/Spain/<br>c.1278_1281dup<br>and<br>c.*22C > A | First<br>decade/<br>39                                | Muscle<br>weakness/nor<br>mal                                  | No/no/no/<br>neck<br>muscles                                   | Yes/yes/wor<br>sening                              | Normal                          | 14/deltoid                       | Yes/yes                                          | Yes                                | NA                                                                                                                     |
| P14/m/Italy/<br>p.T15A and<br>c.621-622del          | 10/55                                                 | Muscle<br>weakness/nor<br>mal                                  | None                                                           | Yes/no/wors<br>ening                               | Slightly                        | Yes/ trapezius                   | ND/yes                                           | Yes                                | Positive                                                                                                               |
| P15/m/Italy/<br>DNA not<br>available                | 7/36                                                  | Muscle<br>weakness/nor<br>mal                                  | None                                                           | Yes/no/ND                                          | Slightly                        | Yes/ Proximal                    | ND/yes                                           | Yes                                | Positive                                                                                                               |
| P16/m/Sweden/<br>p.222-223insA<br>and p.R111C       | First<br>decade/<br>40                                | Muscle<br>weakness/<br>normal                                  | None                                                           | Yes/yes/wor<br>sening                              | X12                             | 50/ proximal<br>20/distal        | Yes/yes                                          | Yes                                | Positive, +3,4<br>DAP                                                                                                  |
| P17/f/Malta/<br>p.M491T and<br>c.714_715insA        | 8/9                                                   | Frequent falls,<br>fatigability<br>when<br>walking/<br>delayed | Learning<br>difficulties                                       | Yes/yes/wor<br>sening                              | Slightly                        | No/distal                        | ND/ND                                            | No                                 | Positive at first,<br>but worsening<br>after 2 years of<br>treatment.<br>Improvement<br>with<br>addition of 3,4<br>DAP |
| P18/m/Malta/<br>p.M491T and<br>c.714_715insA        | 7/13                                                  | Difficulties in<br>running,<br>fatigability/no<br>rmal         | Learning<br>difficulties                                       | Yes/yes/wor<br>sening                              | Slightly                        | ND                               | ND/ND                                            | No                                 | Positive at first,<br>but effect lost<br>after 3 years of<br>treatment                                                 |

|                                                     | Clinical features                                     |                                                                                              |    |                                                                | CK<br>Elevation<br>n x<br>times | EMG                                                |                                                | Muscle biopsy<br>TAs | Therapy<br>Response to<br>AChE<br>inhibitors |                                                      |
|-----------------------------------------------------|-------------------------------------------------------|----------------------------------------------------------------------------------------------|----|----------------------------------------------------------------|---------------------------------|----------------------------------------------------|------------------------------------------------|----------------------|----------------------------------------------|------------------------------------------------------|
|                                                     | Age at<br>onset/<br>age at<br>report<br>(in<br>years) | Symptom<br>onset/<br>motor<br>milestones                                                     | at | Facial/bulb<br>ar/respirat<br>ory muscle<br>weakness/<br>other |                                 | Limb girdle<br>weakness/fl<br>uctuation<br>/course | RNS:<br>decrement<br>3Hz%/muscle               |                      |                                              | at<br>Abnormal<br>SFEMG/<br>Myopathic<br>changes     |
| P19/m/Korea/<br>p.E256Q and<br>p.M499T              | 13/15                                                 | Difficulties in<br>climbing<br>stairs and<br>lifting heavy<br>objects,<br>fatigue/<br>normal |    | None                                                           | Yes/NA/NA                       | X 1.5                                              | 67.1/trapezius<br>17.1/flexor<br>carpi ulnaris | Yes/yes              | Yes                                          | Positive                                             |
| P20/m/NA/<br>c.1700-1716du<br>p17 and<br>c.*22C > A | 0/16                                                  | Poor cry,<br>apneic spells<br>/delayed                                                       |    | No/<br>no/no/<br>distal<br>limb                                | Yes/NA/pro<br>gressive          | NA                                                 | Yes                                            | NA/yes               | Yes                                          | Positive, +3,4<br>DAP                                |
| P21/f/NA/<br>p.Arg545Pro<br>and<br>c.*22C > A       | 8/12                                                  | Difficulty<br>climbing steps<br>/NA                                                          |    | No/<br>no/no/<br>distal<br>limb                                | Yes/NA/pro<br>gressive          | NA                                                 | Yes                                            | NA/yes               | Yes                                          | Positive, +3,4<br>DAP                                |
| P22/f/NA/<br>c.606-8A>G<br>and c.*22C > A           | 12/20                                                 | Unable to<br>squat/NA                                                                        |    | No/<br>no/no/<br>distal<br>limb                                | Yes/NA/pro<br>gressive          | NA                                                 | Yes                                            | NA/yes               | No                                           | Positive, +3,4<br>DAP                                |
| P23/m/NA/<br>p.Asp113Gly<br>and<br>p.Met492Thr      | 19/56                                                 | NA/NA                                                                                        |    | No/<br>no/no/<br>distal<br>limb                                | Yes/NA/pro<br>gressive          | NA                                                 | Yes                                            | NA/yes               | Yes                                          | Positive,<br>+ephedrine                              |
| P24/m/NA/<br>p.Arg17X<br>and<br>c.*22C > A          | 12/12                                                 | Unable to<br>keep up with<br>peers/NA                                                        |    | No/no/yes/<br>distal<br>limb                                   | Yes/NA/pro<br>gressive          | NA                                                 | Yes                                            | NA/yes               | No                                           | Positive,<br>+3,4-DAP,<br>albuterol                  |
| P25/f/NA/<br>c.686-2A>G<br>and p.Arg304X            | 0/1<br>month                                          | Hypotonia,<br>arthrogryposis<br>, weakness of<br>all except the<br>ocular<br>muscles /NA     |    | Yes/yes/ye<br>s/ distal<br>limb                                | Yes/NA/pro<br>gressive          | NA                                                 | Yes                                            | NA/yes               | Yes                                          | Limited<br>response to<br>pyridostigmine,<br>3,4-DAP |
| P26/m/NA/<br>p.Arg111Cys,<br>homozygous             | 10/18                                                 | Difficulty<br>climbing steps<br>/NA                                                          |    | No/<br>no/no/<br>distal<br>limb                                | Yes/NA/pro<br>gressive          | NA                                                 | Yes                                            | NA/yes               | Yes                                          | Positive                                             |

|                                                                     | Clinical features                                     |                                                                                      |    |                                                                  | CK<br>Elevation<br>n x<br>times         | EMG                                                |                                                                                          | Muscle biopsy<br>TAs | Therapy<br>Response to<br>AChE<br>inhibitors |                                                      |
|---------------------------------------------------------------------|-------------------------------------------------------|--------------------------------------------------------------------------------------|----|------------------------------------------------------------------|-----------------------------------------|----------------------------------------------------|------------------------------------------------------------------------------------------|----------------------|----------------------------------------------|------------------------------------------------------|
|                                                                     | Age at<br>onset/<br>age at<br>report<br>(in<br>years) | Symptom<br>onset/<br>motor<br>milestones                                             | at | Facial/bulb<br>ar/respirat<br>ory muscle<br>weakness/<br>other   |                                         | Limb girdle<br>weakness/fl<br>uctuation<br>/course | RNS:<br>decrement<br>3Hz%/muscle                                                         |                      |                                              | at<br>SFEMG/<br>Myopathic<br>changes                 |
| P27/f/NA/<br>p.T350I and<br>c.1337delA                              | 9/64                                                  | Difficulty<br>walking /NA                                                            |    | No/<br>no/no/<br>distal<br>limb                                  | Yes/NA/pro<br>gressive                  | Mildly<br>elevated                                 | Yes                                                                                      | NA/yes               | Yes                                          | Positive                                             |
| P28/m/NA/<br>p.Met1fsX2 and<br>p.Thr15Met                           | 4/9                                                   | Difficulty<br>walking,<br>clumsy /NA                                                 |    | No/<br>no/no/<br>distal<br>limb                                  | Yes/NA/sta<br>ble                       | NA                                                 | Yes                                                                                      | NA/yes               | Yes                                          | Positive, +3,4<br>DAP                                |
| P29/f/USA/<br>c.IVS7-8A>G<br>and<br>c.*22C>A                        | 13/68                                                 | Difficulties<br>with running,<br>climbing<br>stairs and<br>keeping her<br>arms up/NA |    | Yes/no/no/<br>neck and<br>distal<br>muscles                      | Yes/NA/NA                               | Mildly<br>increase<br>d                            | ND                                                                                       | ND/yes               | No                                           | Positive, +3,4<br>DAP                                |
| P30/f/<br>Australia/<br>c.686-2A>G<br>and p.M358V                   | 0/13                                                  | Congenital<br>hypotonia/del<br>ayed                                                  |    | Yes/no/no/<br>contracture<br>s, scoliosis                        | Yes/NA/NA                               | Normal                                             | Yes                                                                                      | NA                   | No                                           | Positive                                             |
| P31/m/Turkey<br>c.686-2A>G,<br>homozygous                           | 13<br>month<br>s/17                                   | Difficulties in<br>rising from<br>the floor/<br>normal                               |    | No/no/no/<br>neck and<br>distal<br>muscles,<br>mild<br>scoliosis | Yes/NA/NA                               | X4                                                 | NA                                                                                       | NA/yes               | No                                           | NA                                                   |
| P32/NA/France<br>/<br>p.Gly39_Lys75<br>delinsGlu and<br>p.Arg111His | First<br>decad<br>e/68                                | Muscle<br>weakness,<br>fatigability/<br>NA                                           |    | No/no/no/<br>distal limb                                         | Yes/yes/wor<br>sening since<br>50 years | X 1.5-3                                            | 20/trapezius<br>44/quadriceps<br>21/abductor<br>digiti minimi<br>38/tibialis<br>anterior | NA                   | Yes                                          | Moderate<br>improvement<br>with AChEI<br>and 3,4-DAP |
| P33/NA/France<br>/<br>p.Arg111Cys,<br>homozygous                    | 1/49                                                  | Muscle<br>weakness/NA                                                                |    | No/Mild/N<br>o/ distal<br>limb                                   | Yes/yes/wor<br>sening since<br>45 years | X 2                                                | 50/trapezius                                                                             | NA                   | Yes                                          | The same as<br>P32                                   |
| P34/NA/France<br>/<br>p.Thr392Pro<br>and<br>p.Met499Arg             | 6/18                                                  | Fatigability/<br>NA                                                                  |    | No/no/no/<br>distal limb                                         | Yes/yes/<br>NA                          | X1.5                                               | 52/trapezius<br>49/ancones<br>45/tibialis<br>anterior                                    | NA                   | Yes                                          | The same as<br>P32                                   |

|                                                         | Clinical features                                     |                                                                                                      |                                                                |                                                                      | CK<br>Elevation<br>n x<br>times | EMG                                                                                   |                                            | Muscle biopsy<br>TAs                                                                                                      | Therapy<br>Response to<br>AChE<br>inhibitors                      |
|---------------------------------------------------------|-------------------------------------------------------|------------------------------------------------------------------------------------------------------|----------------------------------------------------------------|----------------------------------------------------------------------|---------------------------------|---------------------------------------------------------------------------------------|--------------------------------------------|---------------------------------------------------------------------------------------------------------------------------|-------------------------------------------------------------------|
|                                                         | Age at<br>onset/<br>age at<br>report<br>(in<br>years) | Symptom<br>at<br>onset/<br>motor<br>milestones                                                       | Facial/bulb<br>ar/respirat<br>ory muscle<br>weakness/<br>other | Limb girdle<br>weakness/fl<br>uctuation<br>/course                   |                                 | RNS:<br>decrement at<br>3Hz%/muscle                                                   | Abnormal<br>SFEMG/<br>Myopathic<br>changes |                                                                                                                           |                                                                   |
| P35/f/France/<br>p.Arg111Cys,<br>homozygous             | 6/16                                                  | Fatigability/NA                                                                                      | No/no/no/s<br>light<br>transient<br>ptosis,<br>distal<br>limb  | Yes/yes/<br>stable                                                   | Normal                          | 34/trapezius<br>38/ancones<br>33/tibialis<br>anterior                                 | NA                                         | Yes                                                                                                                       | The same as<br>P32                                                |
| P36/f/France/<br>p.Arg111Cys,<br>homozygous             | 2.5/15                                                | Muscle<br>weakness/NA                                                                                | No/no/no/<br>distal<br>limb                                    | Yes/yes/<br>worsening<br>then<br>stability in<br>the last 4<br>years | Normal                          | 50/trapezius<br>54/ancones<br>19/abductor<br>digiti minimi<br>57/tibialis<br>anterior | NA                                         | Yes                                                                                                                       | Moderate<br>improvement,<br>slight<br>improvement<br>with 3,4-DAP |
| P37/NA/France<br>/<br>p.Arg111His<br>and<br>p.Met317Leu | 15/21                                                 | Muscle<br>weakness/NA                                                                                | No/no/no/<br>distal<br>limb                                    | Yes/yes/<br>slight<br>worsening                                      | X2                              | 68/trapezius<br>28/ancones<br>40/tibialis<br>anterior                                 | NA                                         | Yes                                                                                                                       | Moderate<br>improvement<br>with AChEI<br>and 3,4-DAP              |
| P38/m/Nepal/<br>p.Arg14Leu,<br>homozygous               | 5/7                                                   | Proximal<br>weakness/<br>basically<br>normal                                                         | No/no/no/<br>bilateral<br>retinoschis<br>is                    | Yes/NA/NA                                                            | Normal                          | Yes                                                                                   | No/yes                                     | No, maintained<br>fascicular<br>architecture;<br>focal areas of<br>degeneration,<br>regeneration;<br>ragged red<br>fibers | Positive                                                          |
| P39/m/Afghan/<br>p.Thr151Lys,<br>homozygous             | 0/5                                                   | Delayed<br>walking/delay<br>ed                                                                       | None                                                           | Yes/NA/NA                                                            | NA                              | NA                                                                                    | NA                                         | The same as<br>P38                                                                                                        | NA                                                                |
| P40/f/Japan/<br>c.722_723insG,<br>homozygous            | 1.5/38                                                | Difficulties in<br>walking and<br>running/<br>normal                                                 | None                                                           | Yes/yes/wor<br>sening                                                | Normal                          | 22.5/right<br>median nerve                                                            | No/yes                                     | Yes                                                                                                                       | Positive                                                          |
| P41/m/China/<br>p.Lys154Asn<br>and<br>p.Asn363Ser       | 5/23                                                  | Fatigability/NA                                                                                      | None                                                           | Yes/yes/<br>stable                                                   | Normal                          | 55/trapezius<br>62/quadriceps<br>46/abductor<br>digiti minimi                         | NA/yes                                     | Yes                                                                                                                       | Positive                                                          |
| P42/m/Mexica/<br>p.Arg230Ter,ho<br>mozygous             | 0/8                                                   | Congenital<br>hypotonia,<br>low muscle<br>bulk,<br>dysphagia<br>requiring<br>gastrostomy/<br>delayed | Yes/yes/<br>yes/head<br>and distal<br>muscles                  | Yes/no/<br>worsening                                                 | NA                              | 14/abductor<br>pollicis minimi<br>39/trapezius                                        | Yes/NA                                     | No, a<br>population of<br>abnormally<br>small muscle<br>fiber s that was<br>suggestive of a<br>myopathy                   | NA, negative<br>with 3,4-DAP                                      |



|                                                   | Clinical features                                     |                                                                                                                   |    |                                                                                         | CK<br>Elevation<br>n x<br>times    | EMG                                                |                                                                                     | Muscle biopsy<br>TAs | Therapy<br>Response to<br>AChE<br>inhibitors                                                   |                                                              |
|---------------------------------------------------|-------------------------------------------------------|-------------------------------------------------------------------------------------------------------------------|----|-----------------------------------------------------------------------------------------|------------------------------------|----------------------------------------------------|-------------------------------------------------------------------------------------|----------------------|------------------------------------------------------------------------------------------------|--------------------------------------------------------------|
|                                                   | Age at<br>onset/<br>age at<br>report<br>(in<br>years) | Symptom<br>onset/<br>motor<br>milestone                                                                           | at | Facial/bulb<br>ar/respirat<br>ory muscle<br>weakness/<br>other                          |                                    | Limb girdle<br>weakness/fl<br>uctuation<br>/course | RNS:<br>decrement<br>3Hz%/muscle                                                    |                      |                                                                                                | at<br>Abnormal<br>SFEMG/<br>Myopathic<br>changes             |
| P43/m/Mexica/<br>p.Arg230Ter,ho<br>mozygous       | 0/2<br>(dead)                                         | Intubated<br>immediately<br>after delivery<br>and required<br>resuscitation<br>with chest<br>compression/dea<br>d |    | Yes/yes/<br>yes/head<br>and distal<br>muscles                                           | Yes/no/<br>worsening               | NA                                                 | NA                                                                                  | NA                   | No, a mild<br>necrotizing<br>myopathy with<br>extensive<br>autophagic<br>vacuolar<br>pathology | Some benefit                                                 |
| P44/f/China/<br>p.F5Y and<br>p.F194S              | 4/15                                                  | Frequent falls,<br>difficulties in<br>walking,<br>running and<br>jumping/<br>normal                               |    | No/no/no/<br>mild<br>bilateral<br>ptosis,<br>distal<br>muscles of<br>the upper<br>limbs | Yes/yes/<br>worsening<br>at age 11 | X2.5                                               | 42/left trapezius<br>50/right<br>trapezius<br>18/right<br>abductor digiti<br>minimi | Yes/yes              | Yes, with<br>rimmed<br>vacuoles                                                                | Alleviated<br>partially,<br>improvement<br>with<br>albuterol |
| P45/m/China/<br>p.Arg111Cys<br>and<br>p.Ala550Thr | 0/4                                                   | NA                                                                                                                |    | None                                                                                    | Yes/NA/NA                          | Normal                                             | Yes                                                                                 | No/no                | Mild changes or<br>non-specific<br>myopathies                                                  | NA                                                           |
| P46/m/China/<br>p.Val650Ala,<br>homozygous        | 6/14                                                  | NA                                                                                                                |    | None                                                                                    | Yes/NA/NA                          | X1.5                                               | Yes                                                                                 | NA                   | Yes                                                                                            | Positive                                                     |
| P47/m/China/<br>p.Thr15Met,<br>homozygous         | 5/18                                                  | NA                                                                                                                |    | None                                                                                    | Yes/NA/NA                          | X2                                                 | Yes                                                                                 | NA/yes               | Yes                                                                                            | Positive                                                     |
| P47/m/China/<br>p.Thr15Met,<br>homozygous         | 5/18                                                  | NA                                                                                                                |    | None                                                                                    | Yes/NA/NA                          | X2                                                 | Yes                                                                                 | NA/yes               | Yes                                                                                            | Positive                                                     |
| P48/m/China/<br>p.Tyr367Cys<br>and<br>p.Gly564Cys | 0/17                                                  | NA                                                                                                                |    | None                                                                                    | Yes/NA/NA                          | Normal                                             | Yes                                                                                 | NA/yes               | Yes                                                                                            | Positive                                                     |
| P49/f/China/<br>p.Arg246* and<br>p.Thr643Pro      | 17/47                                                 | NA                                                                                                                |    | No/yes/yes<br>/cervical<br>weakness                                                     | Yes/NA/NA                          | Normal                                             | Yes                                                                                 | NA/yes               | Yes                                                                                            | Positive                                                     |
| P50/m/China/<br>p.Gly26Ser and<br>p.Val291Ile     | 3/14                                                  | NA                                                                                                                |    | None                                                                                    | Yes/NA/NA                          | Normal                                             | Yes                                                                                 | NA/yes               | Mild changes or<br>non-specific<br>myopathies                                                  | Positive                                                     |
| P51/m/China/<br>p.His677Tyr                       | 7/15                                                  | NA                                                                                                                |    | None                                                                                    | Yes/NA/NA                          | Normal                                             | Yes                                                                                 | NA                   | Yes                                                                                            | Positive                                                     |

The above cases in table S1 came from 14 literatures ( Patient 1-18, Patient 19, Patient 20-28, Patient 29 , Patient 30, Patient 31, Patient 32-37, Patient 38-39, Patient 40, Patient 41 , Patient 42-43, Patient 44 , Patient 45-51) ,which are listed in the order of publication time.

**Abbreviations:** P1: patient 1; LGM: limb-girdle muscle weakness; M: male; F: female; NA: not available; ND: not done; TAs: tubular aggregations; CK: creatine kinase. EMG: electromyography; 3, 4-DAP: 3, 4-Diaminopyridine; RNS: repetitive nerve stimulation; SFEMG: single fiber EMG; AChEI: acetylcholinesterase inhibitors.
